# Supplementary material for: Single-cell transcriptomic analysis of mouse neocortical development
Source: PubMed Central journal article supplement (PMC6329831; doi:10.1038/s41467-018-08079-9), 2019-01-11
Supplement: 41467_2018_8079_MOESM1_ESM.pdf [file 41467_2018_8079_MOESM1_ESM.pdf]

# Single-cell transcriptomic analysis of mouse neocortical development

Loo and Simon, *et al.*

Supplementary Information

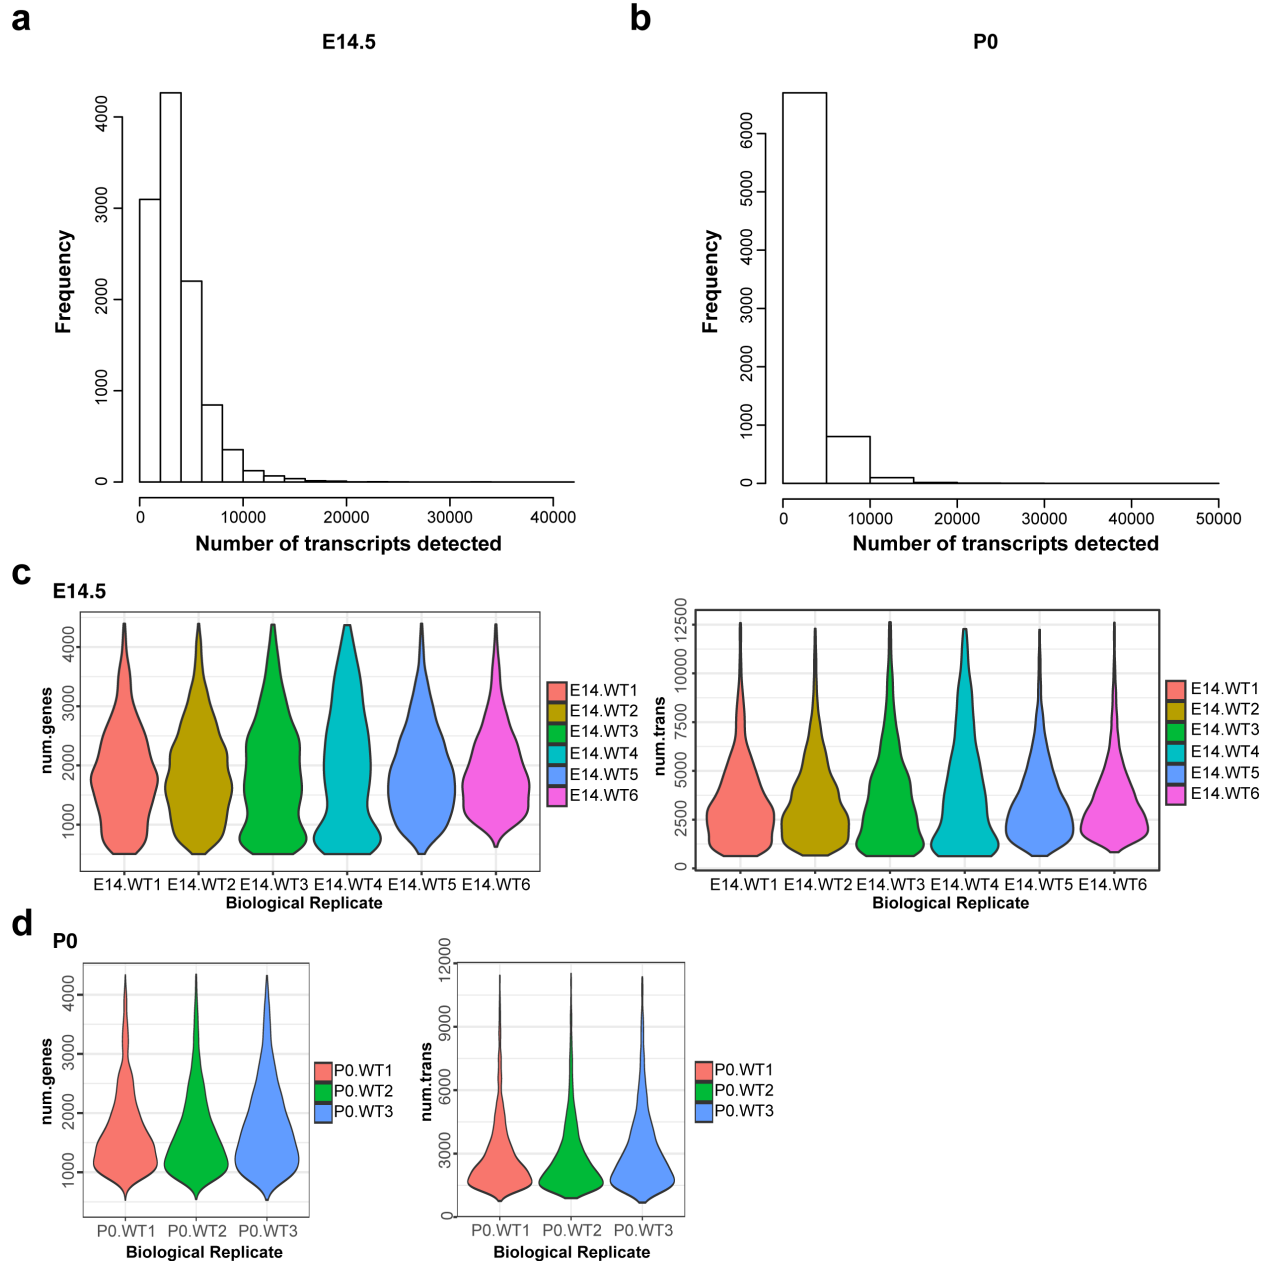

**Supplementary Figure 1. Quality statistics of E14.5 and P0 Drop-seq data. a–b.** Histogram showing total number of transcripts detected in E14.5 (a) and P0 (b) samples. **c–d.** Violin plots of total number of genes (left) and total number of transcripts (right) detected for each biological replicate for E14.5 (c) and P0 (d) samples.



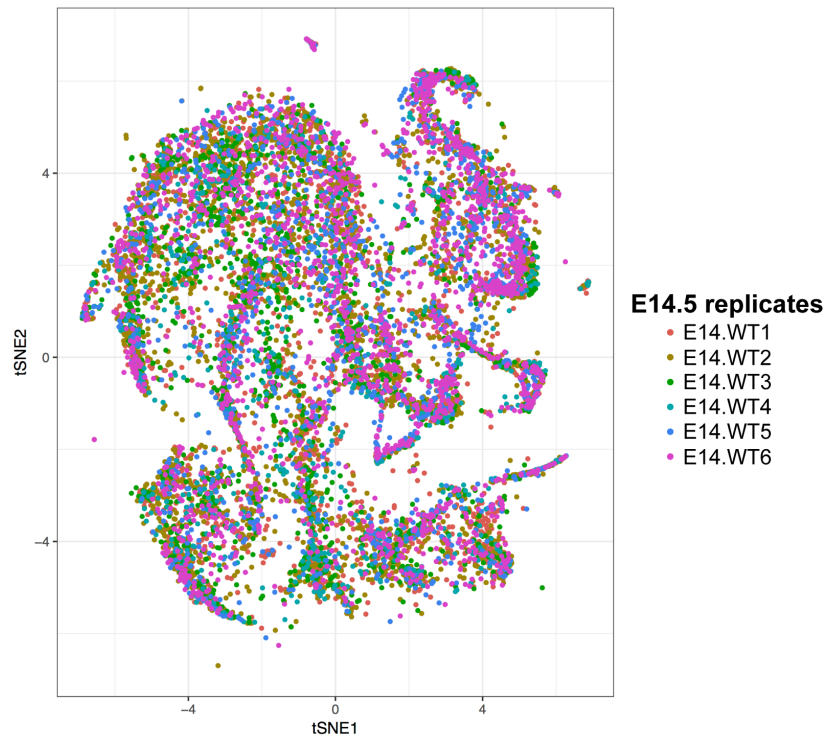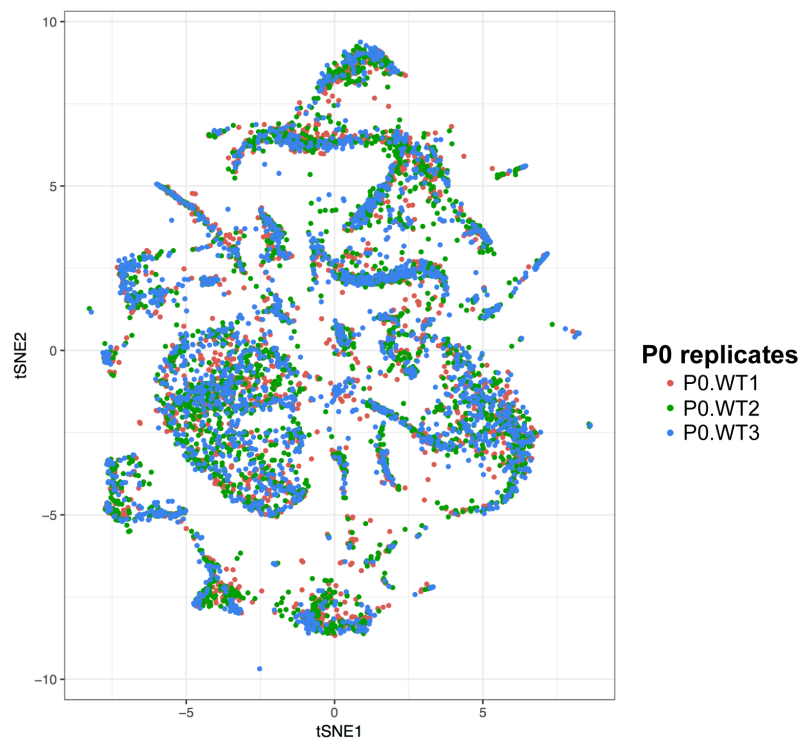

**Supplementary Figure 2. Drop-seq expression data from all replicates visualized by tSNE.** tSNE visualization of significant principal components, where points are labeled by their biological replicate for E14.5 (top) and P0 (bottom).

**a E14.5**

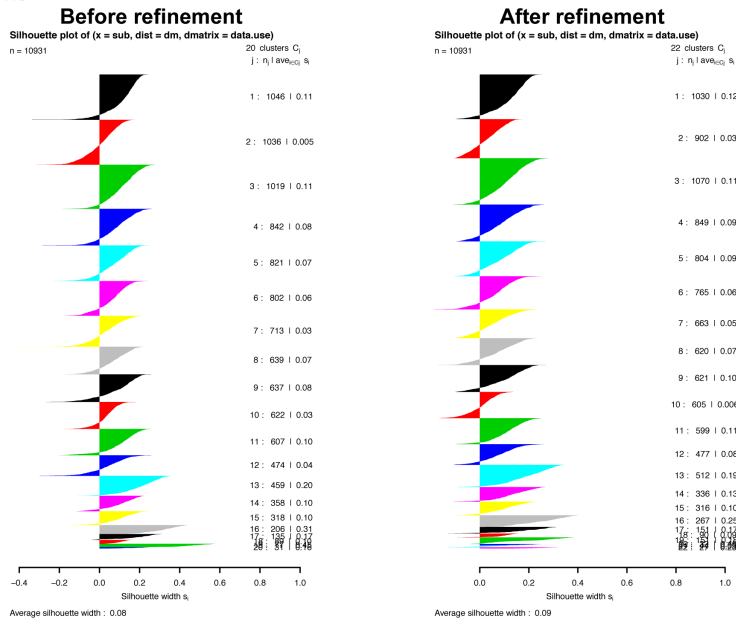

**b P0**

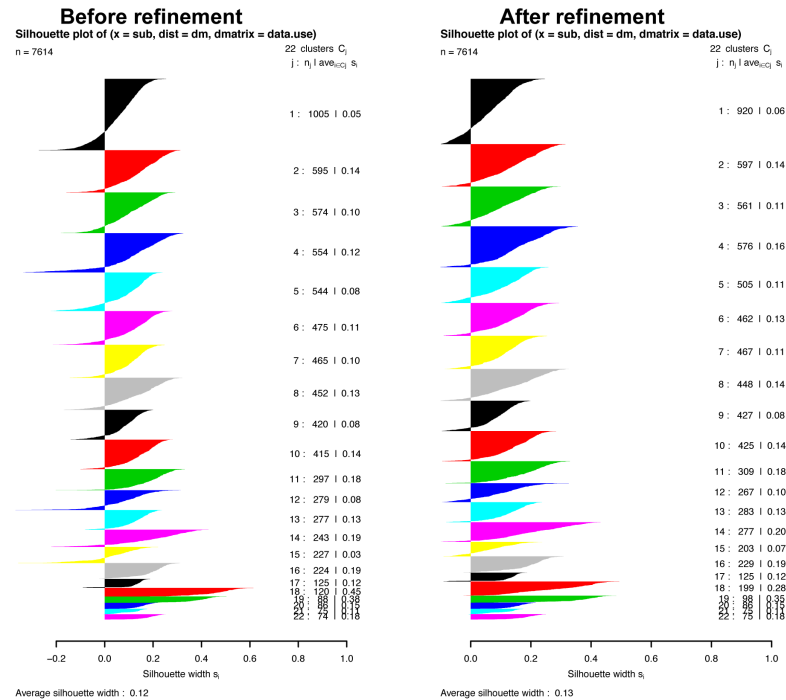

**Supplementary Figure 3. Cluster refinement methodology improves cluster assignments and robustness.** Silhouette width plots before (left) and after (right) running the cluster refinement method for E14.5 (a) and P0 (b) samples. Each row represents one cell, and the silhouette widths were determined using Spearman correlation distances. Positive values indicate a robust cluster assignment. The method allows some cluster outliers to form their own novel clusters, which happens twice in the E14.5 samples.



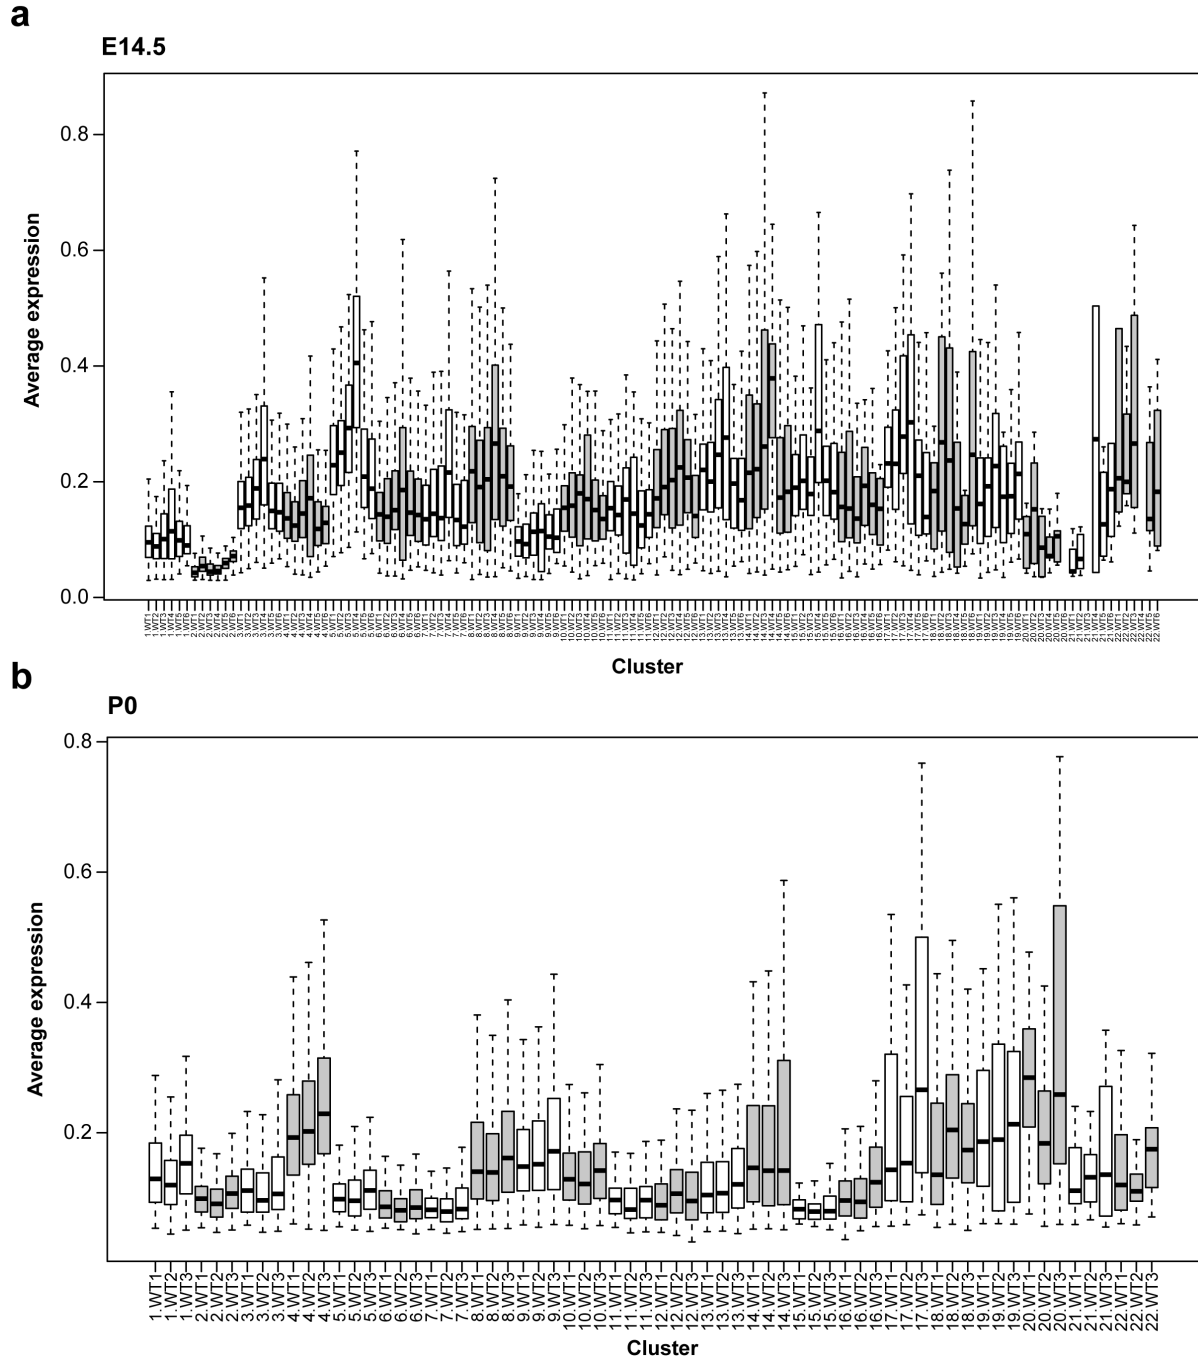

**Supplementary Figure 5. Cross-replicate comparison of library quality, separated by cluster.** Box-and-whisker plots depicting the distribution of the average expression values for each biological replicate for each cluster, for E14.5 (**a**), and P0 (**b**). Expression values for all genes for a given biological replicate were averaged within each cluster. Variability cluster-to-cluster is expected, as different cell types may have differing numbers of transcripts expressed, however, variability across replicates within a given cluster is limited, suggestive of consistent representation and strong reproducibility.

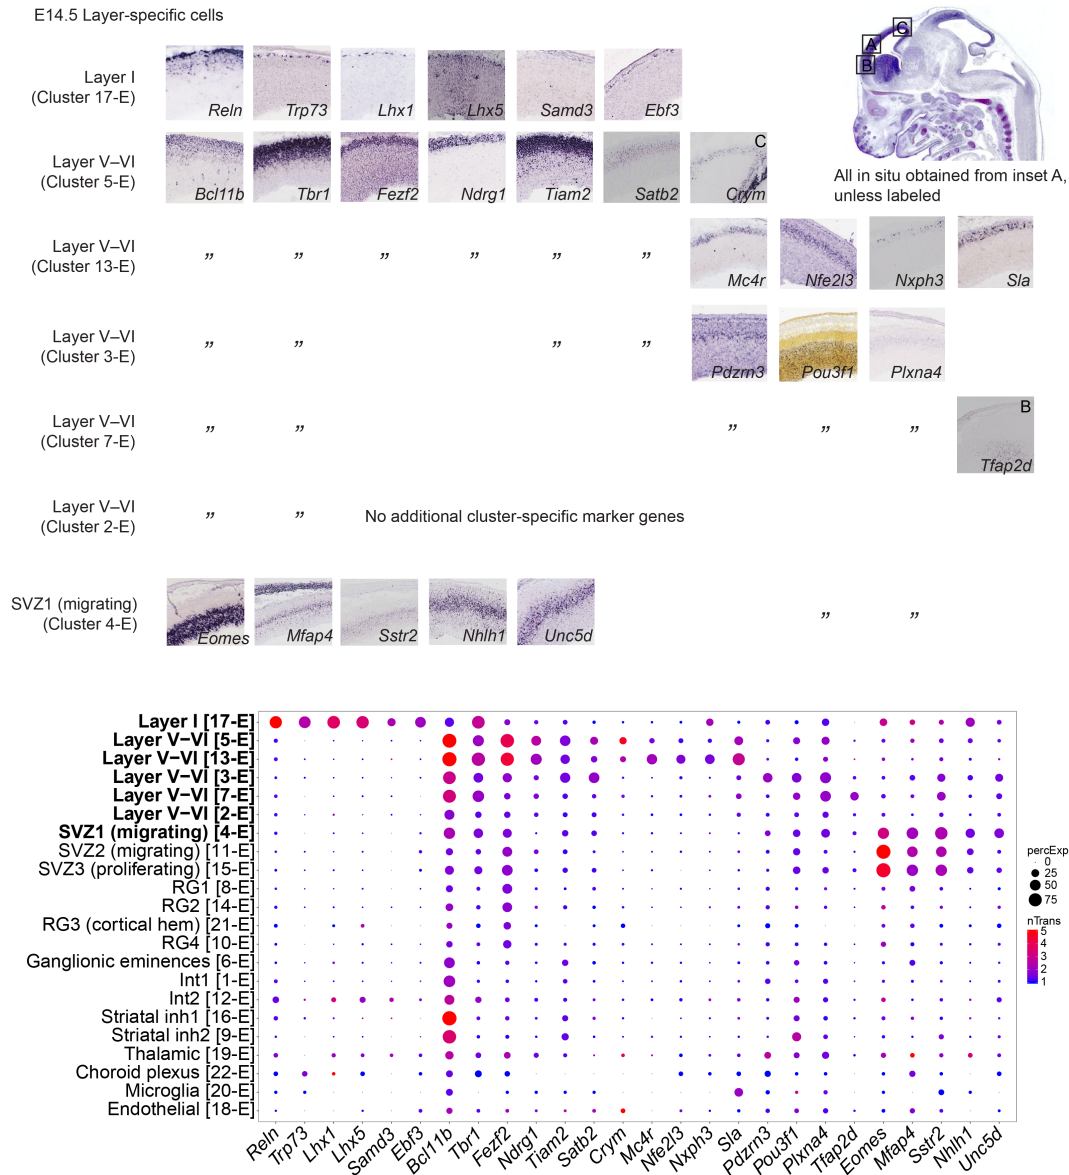

**Supplementary Figure 6. Validation of marker gene expression in E14.5 layer-specific cells.** RNA *in situ* hybridization images were obtained from E14.5 cerebral cortex, provided by Eurexpress online database ([www.eurexpress.org](http://www.eurexpress.org)) except *Pou3f1* obtained from Allen Institute for Brain Science ([www.developingmouse.brain-map.org](http://www.developingmouse.brain-map.org)). Layer I (17-E) expresses canonical Cajal-Retzius cell markers *Reln*, *Trp73*, *Lhx1* and *Lhx5*. Layer V-VI clusters (5-E, 13-E, 3-E, 7-E and 2-E) express deep layer markers, *Bcl11b* (also known as *Ctip2*) and *Tbr1*. Expression of *Satb2* in clusters 5-E, 13-E and 3-E suggests eventual differentiation into upper layer callosal projection neurons. SVZ1 (4-E) expresses *Eomes* (also known as *Tbr2*), *Sstr2*, a migrational marker, and *Unc5d*, a netrin receptor involved in cell migration. Dotplot representations of expression levels and proportion of cells with detected transcripts for markers of each cell type. Y axis denotes cluster type; X axis denotes gene name. See **Supplementary Data 2** for annotation of selected markers.

E14.5 Interneurons and Non-cortical

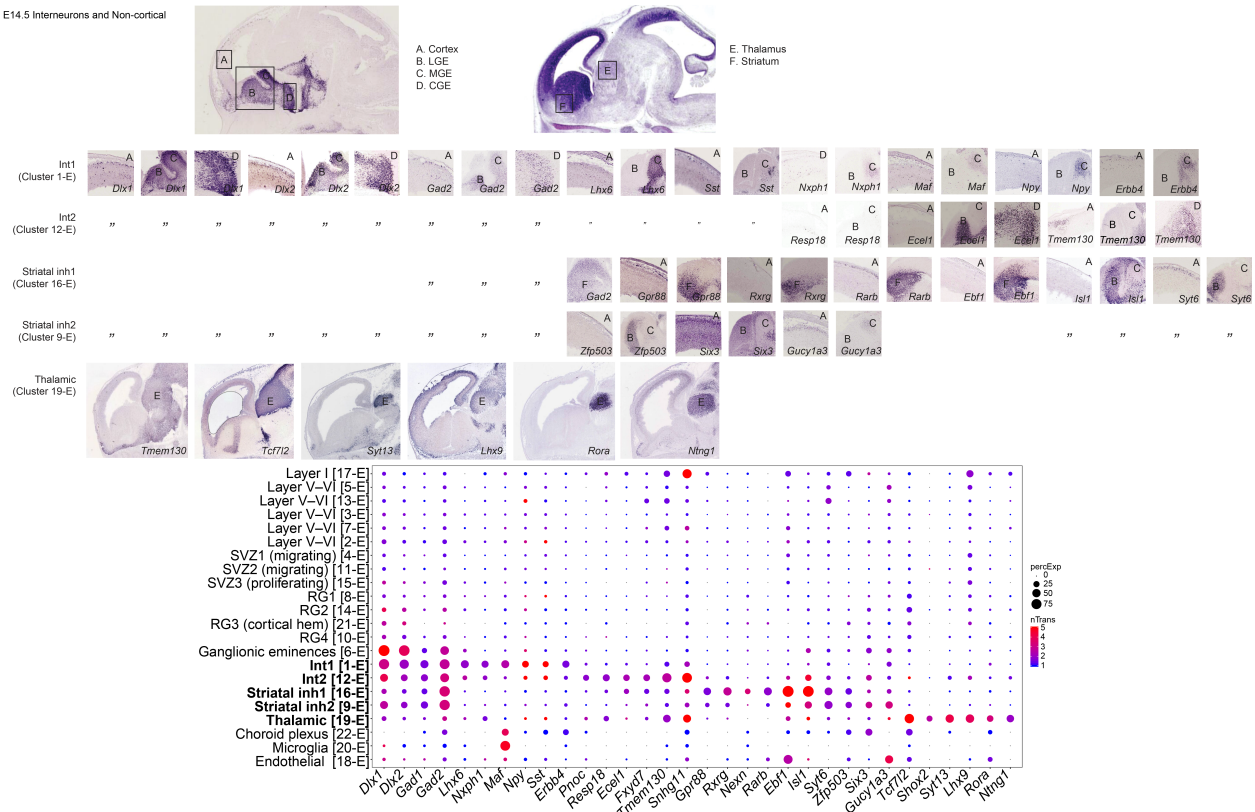

**Supplementary Figure 7. Validation of marker gene expression in E14.5 interneurons and non-cortical cells.** RNA *in situ* hybridization images were obtained from E14.5 cerebral cortex, ganglionic eminences, striatum and thalamus, provided by Eurexpress online database ([www.eurexpress.org](http://www.eurexpress.org)). The largest cortical interneuron cluster, Int1 (9.41% of total population, cluster 1-E) expresses *Lhx6*, a transcription factor for MGE-derived cortical Parvalbumin (PV) and Somatostatin (Sst) interneurons. A smaller cluster, Int2 (4.31% of total population, cluster 12-E), expresses lower levels of *Lhx6* and RNA *in situ* expression of *Resp18*, *Ecel1* and *Tmem180* indicate a second distinct population of PV and Sst cortical interneurons. 16-E and 9-E express *Isl1*, a lateral ganglionic eminence (LGE) marker. A subset of these LGE-derived GABAergic neurons are possible cortical interneurons (reported in Anderson *et al.*, *Development*, 2001). However, 16-E expresses striatal markers *Gpr88*, *Rxrg* and *Rarb* while 9-E expresses *Zfp503*, a marker of developing striatum and are therefore designated as Striatal inh1 and 2. A small population of cells (1.28% of total population, cluster 19-E) express thalamic markers *Tcf7l2*, *Shox2*, *Syt13*, *Lhx9*, *Rora* and *Ntng1*. Dotplot representations of expression levels and proportion of cells with detected transcripts for markers of each cell type. Y axis denotes cluster type; X axis denotes gene name. See **Supplementary Data 2** for annotation of selected markers.



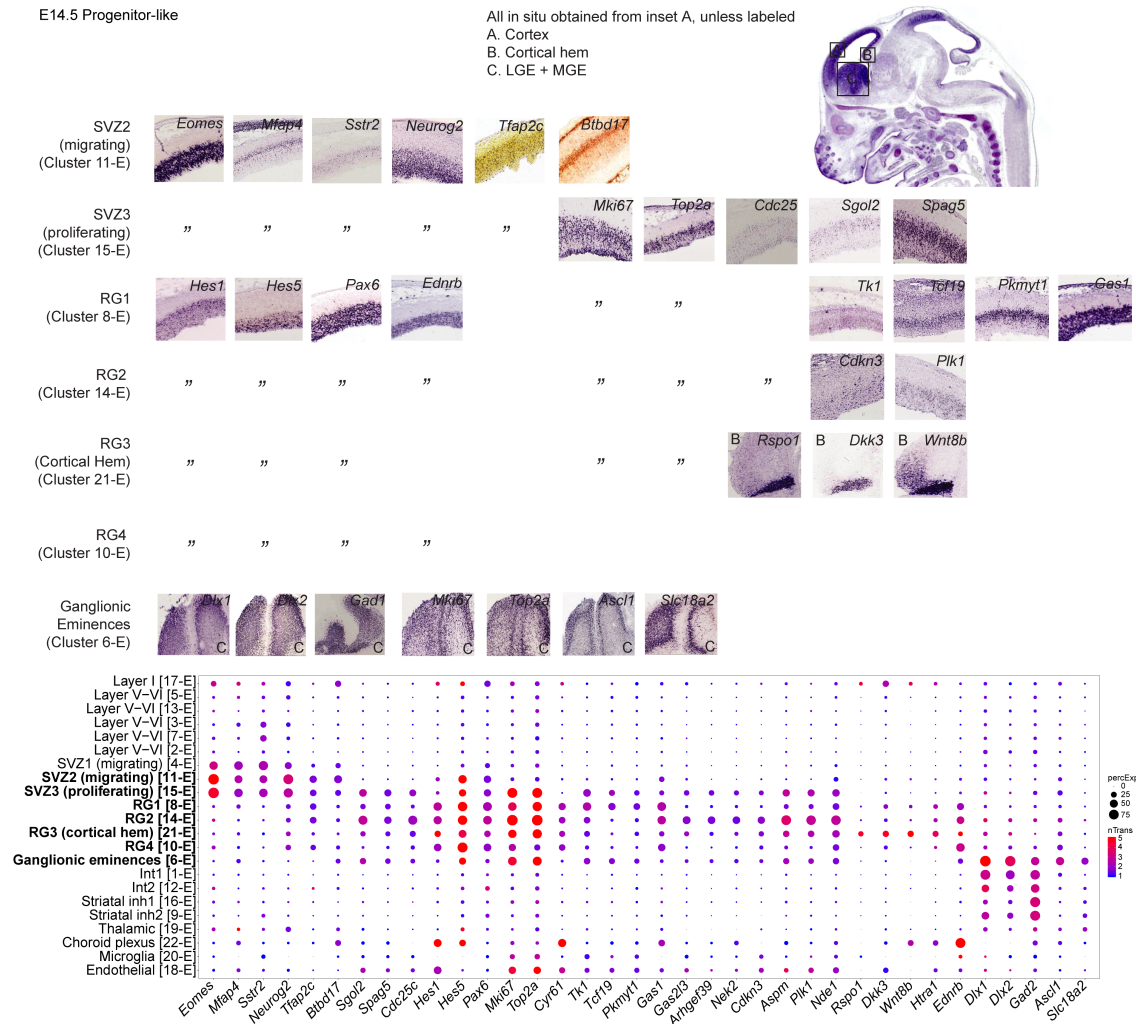

**Supplementary Figure 8. Validation of marker gene expression in E14.5 progenitor-like cells.** RNA *in situ* hybridization images were obtained from E14.5 cerebral cortex, cortical hem and ganglionic eminences, provided by Eurexpress online database ([www.eurexpress.org](http://www.eurexpress.org)) except *Tfap2c* obtained from Allen Institute for Brain Science ([www.developingmouse.brain-map.org](http://www.developingmouse.brain-map.org)) and *Btbd17* from GENSAT online database ([www.gensat.org](http://www.gensat.org)). SVZ2 (11-E) expresses *Sstr2*, a migrational marker and *Neurog2*, which initiates delamination of radial glia and neuronal lineage commitment. SVZ3 (15-E), RG1 (8-E), RG2 (14-E), RG3 (21-E) and ganglionic eminences (6-E) express *Mki67* and *Top2a*, markers of cell proliferation. RG1–4 express radial glia markers *Hes1*, *Hes5* and *Pax6*, while RG3 specifically expresses *Rspo1*, *Dkk3*, and *Wnt8b*, markers of cortical hem. Ganglionic eminences (6-E) express various GABAergic markers such as *Dlx1*, *Dlx2* and *Gad2*. Dotplot representations of expression levels and proportion of cells with detected transcripts for markers of each cell type. Y axis denotes cluster type; X axis denotes gene name. See **Supplementary Data 2** for annotation of selected markers.

E14.5 Non-neuronal

Choroid plexus  
(Cluster 22-E)

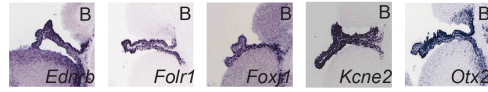

Microglia  
(Cluster 20-E)

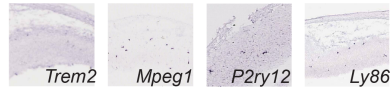

Endothelial  
(Cluster 18-E)

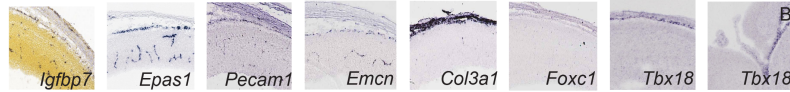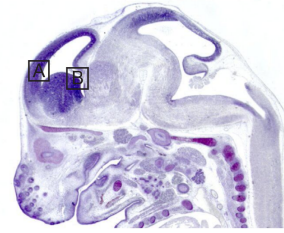

All in situ obtained from inset A, unless labeled  
A. Cortex  
B. Choroid plexus

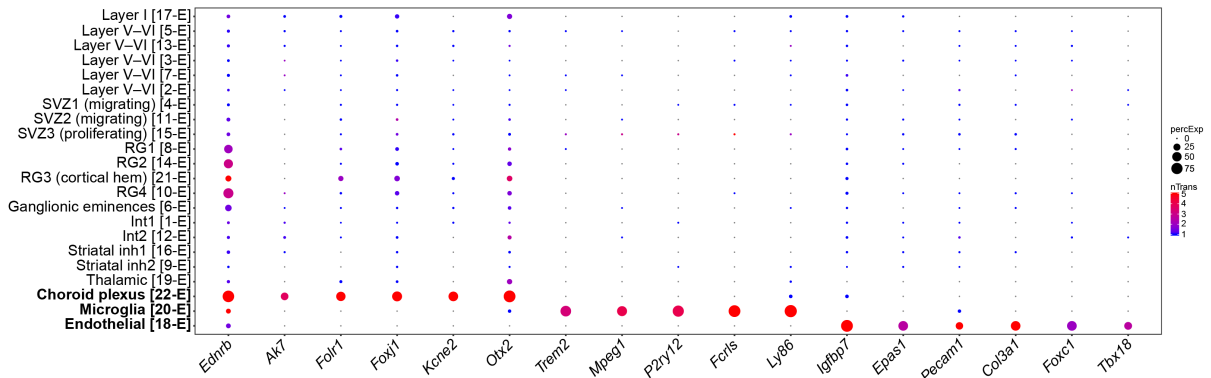

**Supplementary Figure 9. Validation of marker gene expression in E14.5 non-neuronal cells.** RNA *in situ* hybridization images were obtained from E14.5 cerebral cortex and choroid plexus, provided by Eurexpress online database ([www.eurexpress.org](http://www.eurexpress.org)) except *Igfbp7* obtained from Allen Institute for Brain Science ([www.developingmouse.brain-map.org](http://www.developingmouse.brain-map.org)). Cluster 22-E expresses choroid plexus markers *Folr1*, *Foxj1*, *Kcne2* and *Otx2*. Cluster 20-E expresses microglial markers *Trem2*, *Mpeg1*, *P2ry12* and *Ly86*. Cluster 18-E expresses endothelial markers *Igfbp7*, *Epas1* and *Pecam1*. Dotplot representations of expression levels and proportion of cells with detected transcripts for markers of each cell type. Y axis denotes cluster type; X axis denotes gene name. See **Supplementary Data 2** for annotation of selected markers.



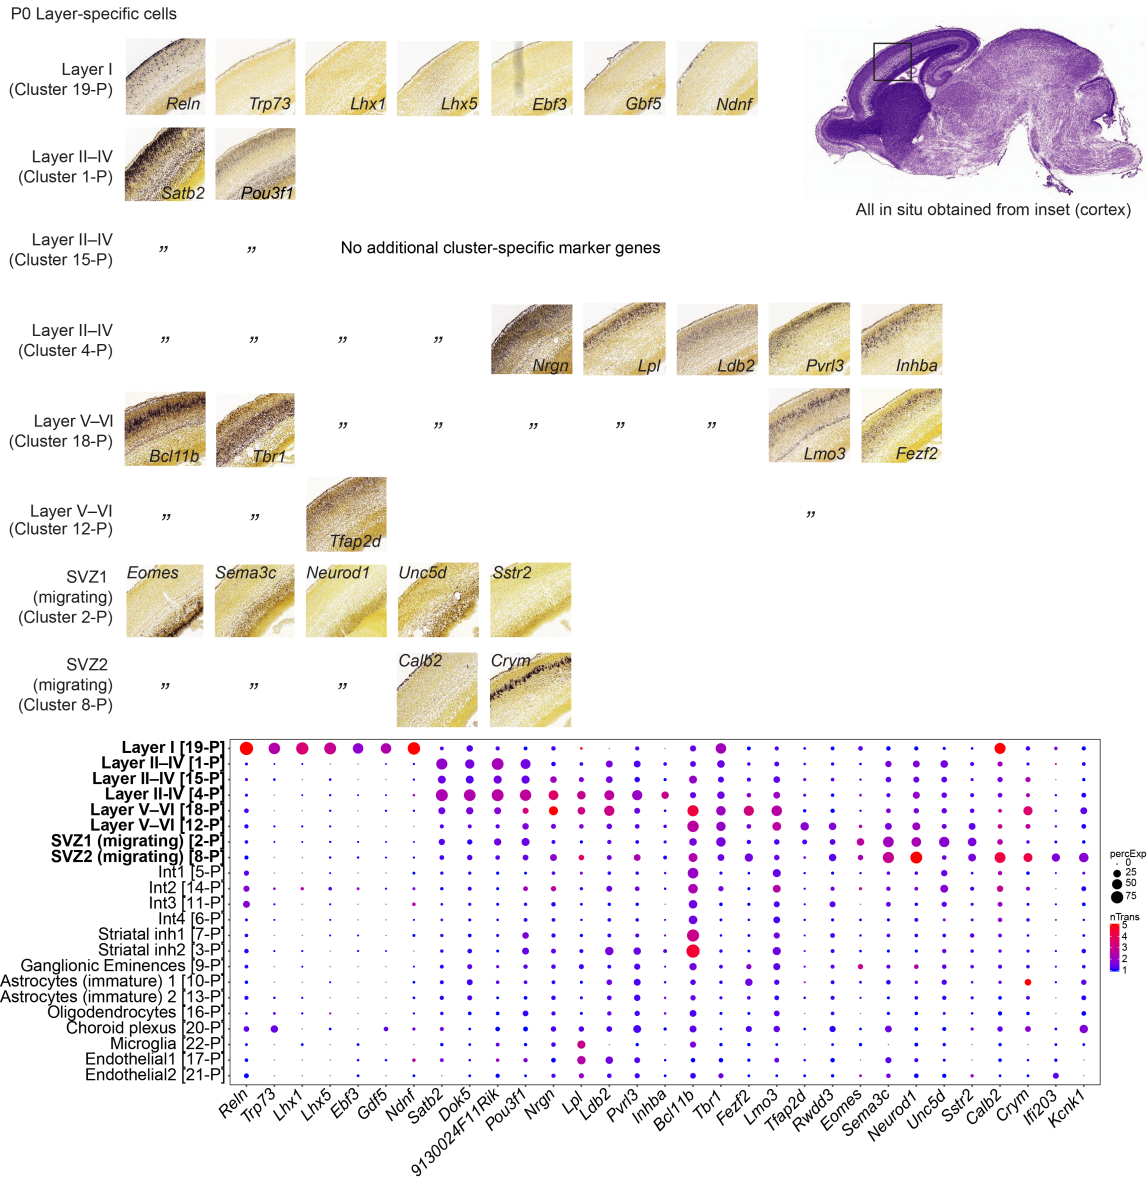

**Supplementary Figure 10. Validation of marker gene expression in P0 layer-specific cells.** RNA *in situ* hybridization images were obtained from E18.5 cerebral cortex, provided by Allen Institute for Brain Science ([www.developingmouse.brain-map.org](http://www.developingmouse.brain-map.org)). Layer I (cluster 19-P) expresses Cajal-Retzius markers *Reln*, *Trp73*, *Lhx1* and *Lhx5*. Layer II-IV (clusters 1-P, 15-P, 4-P) expresses *Satb2*, a marker for upper layer callosal projection neurons and *Pou3f1*, a migrational marker observed in cluster 3-E (**Supplementary Fig. 6**). Deeper layer clusters 18-P and 12-P express *Bcl11b* and *Tbr1*. 18-P is designated layer V-VI as it expresses *Fezf2*, a layer V-specific corticospinal neuron marker. SVZ1 (2-P) and SVZ2 (8-P) express *Eomes* (*Tbr2*) and *Sema3c*, a marker of migrating newborn neurons. Dotplot representations of expression levels and proportion of cells with detected transcripts for markers of each cell type. Y axis denotes cluster type; X axis denotes gene name. See **Supplementary Data 2** for annotation of selected markers.

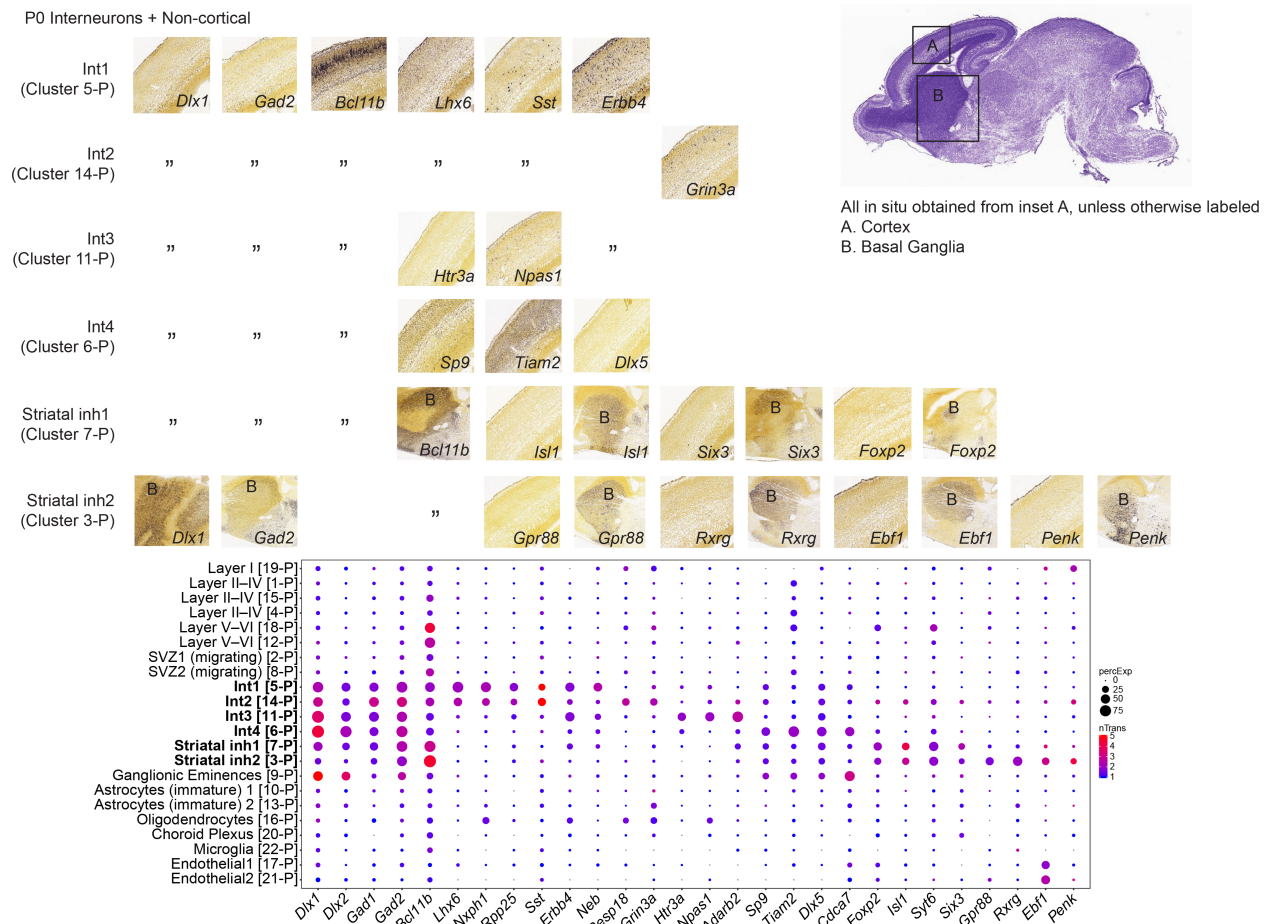

**Supplementary Figure 11. Validation of marker gene expression in P0 interneurons and non-cortical cells.** RNA *in situ* hybridization images were obtained from E18.5 cerebral cortex, basal ganglia and preoptic area, provided by Allen Institute for Brain Science ([www.developingmouse.brain-map.org](http://www.developingmouse.brain-map.org)). Int1 (5-P), Int2 (14-P), Int3 (11-P), Int4 (6-P), Striatal inh1 (7-P) and Striatal inh2 (3-P) express GABAergic markers *Dlx1*, *Dlx2*, *Gad1* and *Gad2*. Int1 and Int2 express *Lhx6* and *Nrxp1*, markers of PV and *Sst*<sup>+</sup> interneuron precursors, while Int4 expresses *Cdca7*, a marker expressed in a subset of PV and *Sst*<sup>+</sup> interneurons. Int3 expresses *Htr3a*, *Npas1* and *Adarb2*, markers of VIP cortical interneurons. Striatal inh1 and 2 express striatal markers *Isl1* and *Gpr88* respectively. Dotplot representations of expression levels and proportion of cells with detected transcripts for markers of each cell type. Y axis denotes cluster type; X axis denotes gene name. See **Supplementary Data 2** for annotation of selected markers.

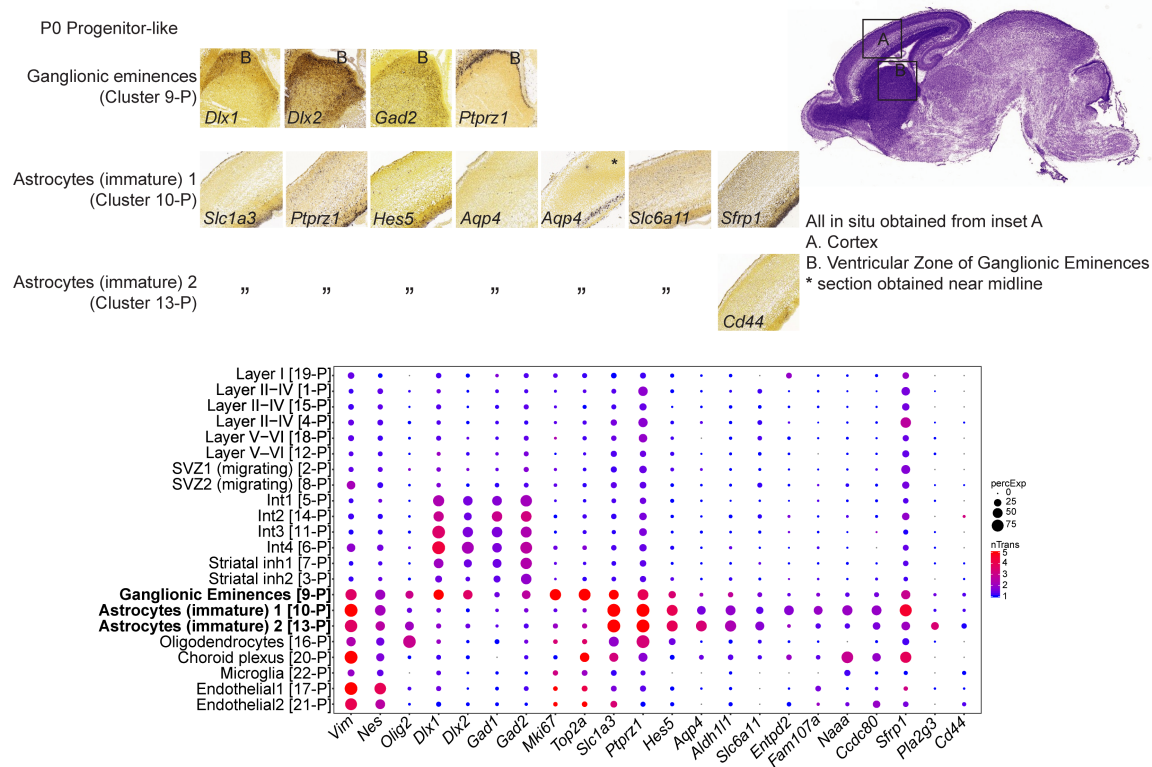

**Supplementary Figure 12. Validation of marker gene in P0 progenitor-like cells.** RNA *in situ* hybridization images were obtained from E18.5 cerebral cortex and ganglionic eminence, provided by Allen Institute for Brain Science ([www.developingmouse.brain-map.org](http://www.developingmouse.brain-map.org)). Ganglionic eminences (Cluster 9-P) express GABAergic markers *Dlx1*, *Dlx2* and *Gad2* and proliferation markers *Mki67* and *Top2a*. Astrocytes (immature) 1 (10-P) and 2 (13-P) express astrocytic markers *Ptprz1*, *Aqp4* and *Aldh11* while maintaining some expression of radial glia marker *Hes5*. Dotplot representations of expression levels and proportion of cells with detected transcripts for markers of each cell type. Y axis denotes cluster type; X axis denotes gene name. See **Supplementary Data 2** for annotation of selected markers.

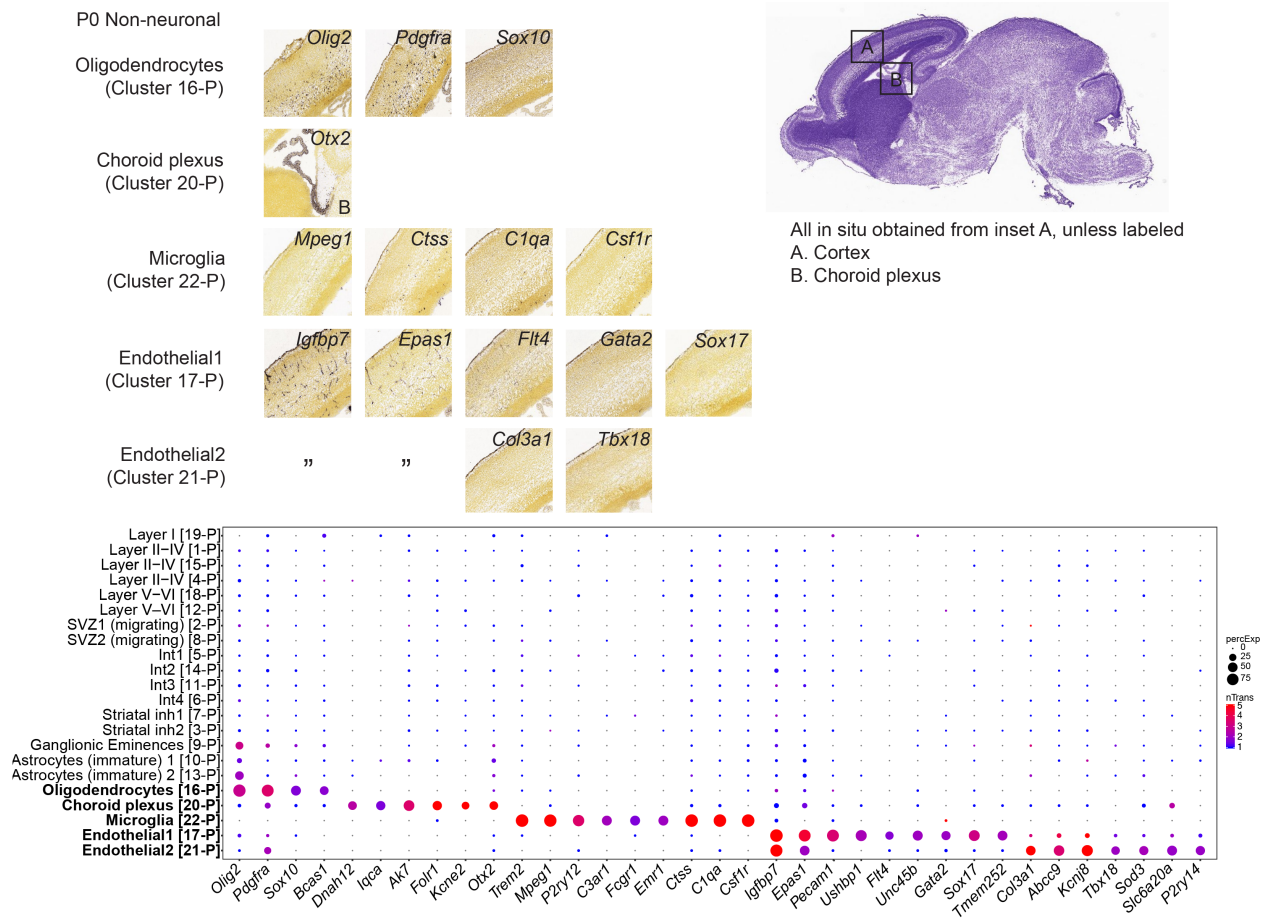

**Supplementary Figure 13. Validation of marker gene expression in P0 non-neuronal cells.** RNA *in situ* hybridization images were obtained from E18.5 cerebral cortex and choroid plexus, provided by Allen Institute for Brain Science ([www.developingmouse.brain-map.org](http://www.developingmouse.brain-map.org)). Cluster 16-P expresses oligodendrocyte markers *Olig2* and *Pdgfra*. Cluster 20-P expresses choroid plexus markers *Ak7*, *Folr1*, *Kcne2* and *Otx2*. Cluster 22-P expresses microglial markers *Mpeg1*, *Ctss*, *C1qa* and *Csf1r*. Clusters 17-P and 21-P express endothelial markers *Igf1bp7* and *Epas1*. Dotplot representations of expression levels and proportion of cells with detected transcripts for markers of each cell type. Y axis denotes cluster type; X axis denotes gene name. See **Supplementary Data 2** for annotation of selected markers.



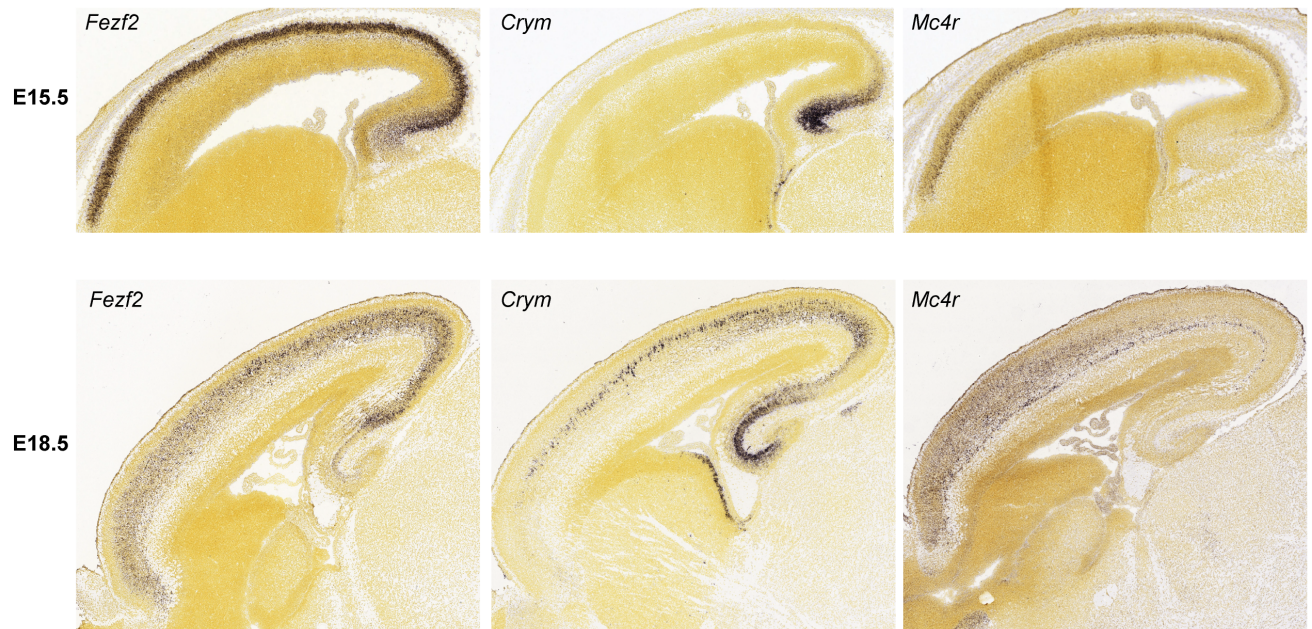

**Supplementary Figure 14. Validation of area-specific expression of *Crym* and *Mc4r* in E15.5 and E18.5 cortex.** RNA *in situ* hybridization images were obtained from E15.5 and E18.5 cerebral cortex, provided by Allen Institute for Brain Science ([www.developingmouse.brain-map.org](http://www.developingmouse.brain-map.org)). Upper-layer neurons marked by *Fezf2* express *Crym* (caudally) or *Mc4r* (rostrally).

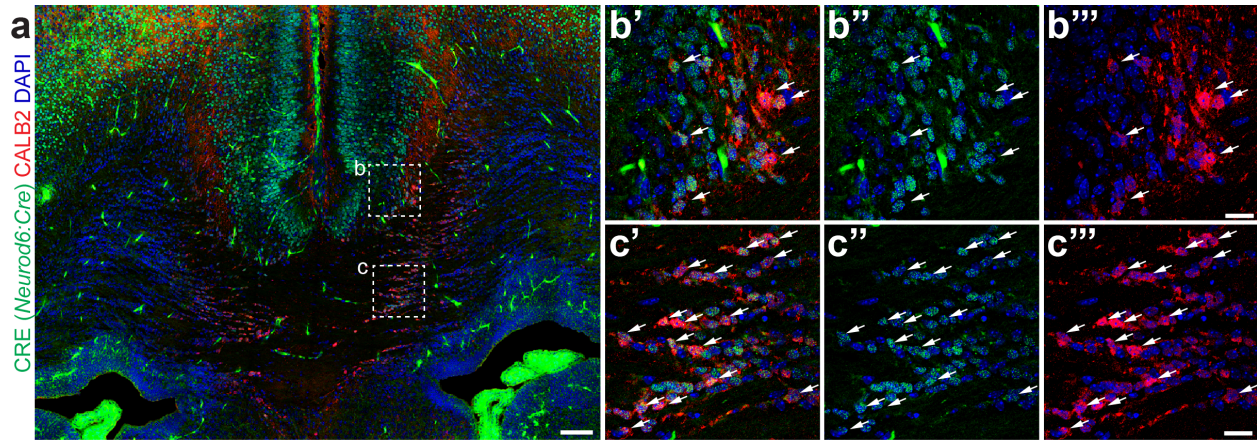

**Supplementary Figure 15. Empirical validation of NEUROD6 and CALB2 co-labeling in the P0 cortex.** Coronal sections of the P0 cortex from *Neurod6-CRE* mice were stained with antibodies against CRE (green), CALB2 (calretinin, red), and DAPI (blue). Cells expressing both CRE and CALB2 were observed in the cortical plate (**a–b**) and corpus callosum (**a, c**). In the corpus callosum, CRE<sup>+</sup>CALB2<sup>+</sup> cells were distributed along chain-like cell stripes (**a, c**). Higher resolution images of insets **b** and **c** were shown in (**b'**, **b''** and **b'''**) and (**c'**, **c''** and **c'''**), respectively. Examples of CRE<sup>+</sup>CALB2<sup>+</sup> cells are indicated by arrowheads. Scale bar in panel **a**, 200 μm; scale bars in **b'''** and **c'''**, 20 μm.

**a**

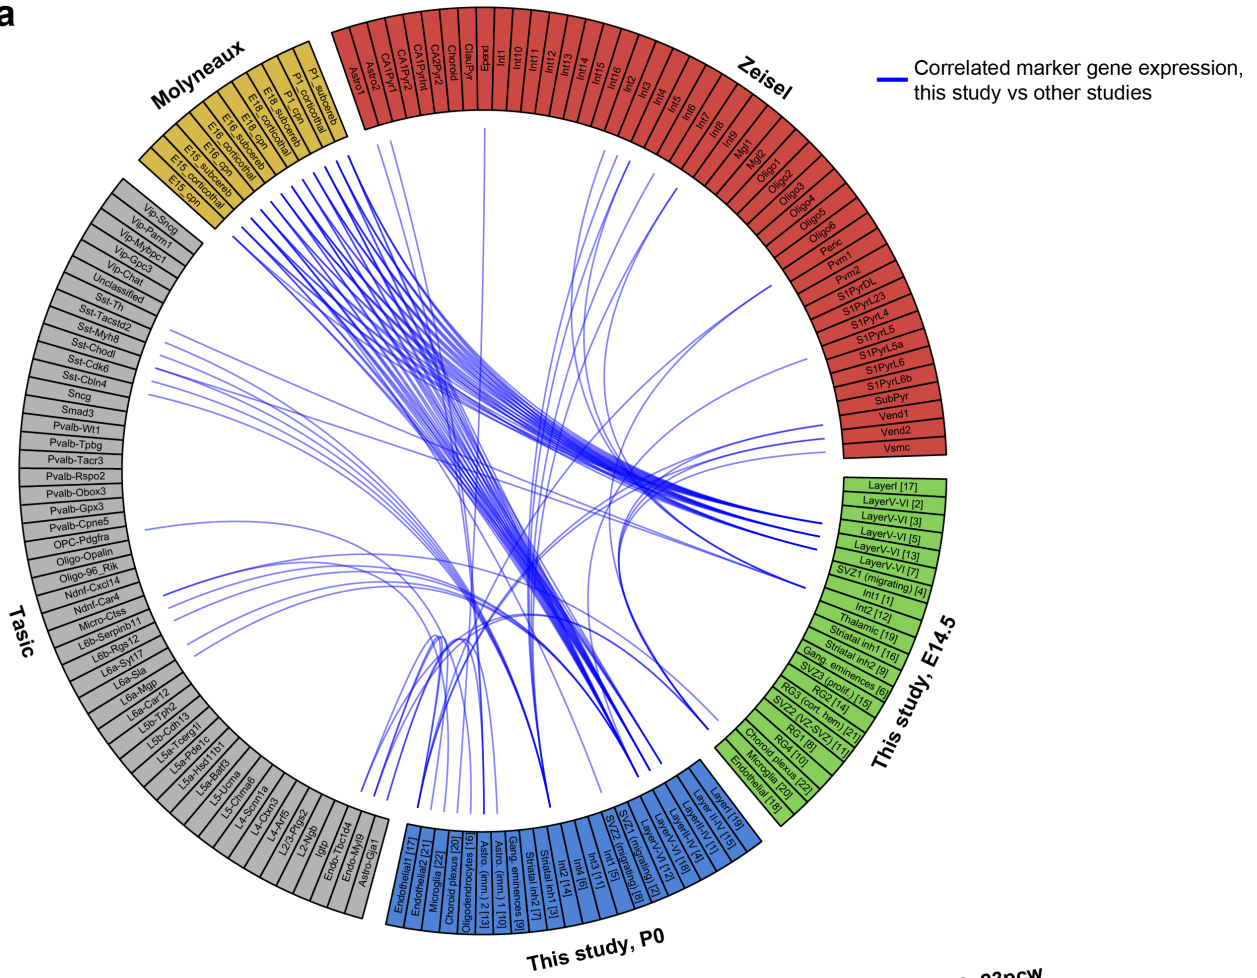

**b**

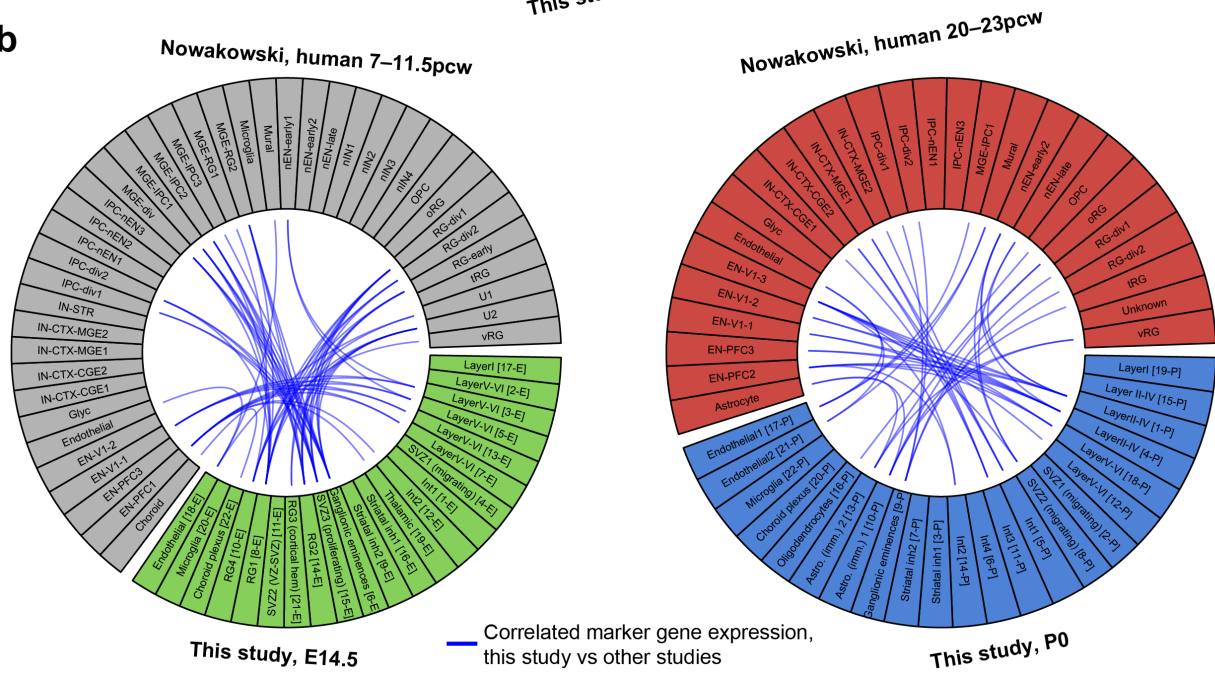

**Supplementary Figure 16. Correlative analyses to other published datasets. a.** Correlation of expression profiles between cells identified in this study and those identified by Tasic *et al.*, Molyneaux *et al.*, and Zeisel *et al.* Gene expression matrices were collapsed by taking mean of all cells within a cluster, then correlations were computed pairwise between all cell types of all studies using the intersection of cell-specific and subcluster-specific genes. Lines were drawn only for comparisons between data from this study and other studies, and when those correlations exceeded a minimum threshold ( $r > 0.3$ ). **b.** Similar analysis as in (a) except with cell types and marker genes (orthologs) from Nowakowski *et al.* study of human fetal cells. Threshold for depicting correlation was  $r > 0.2$ .



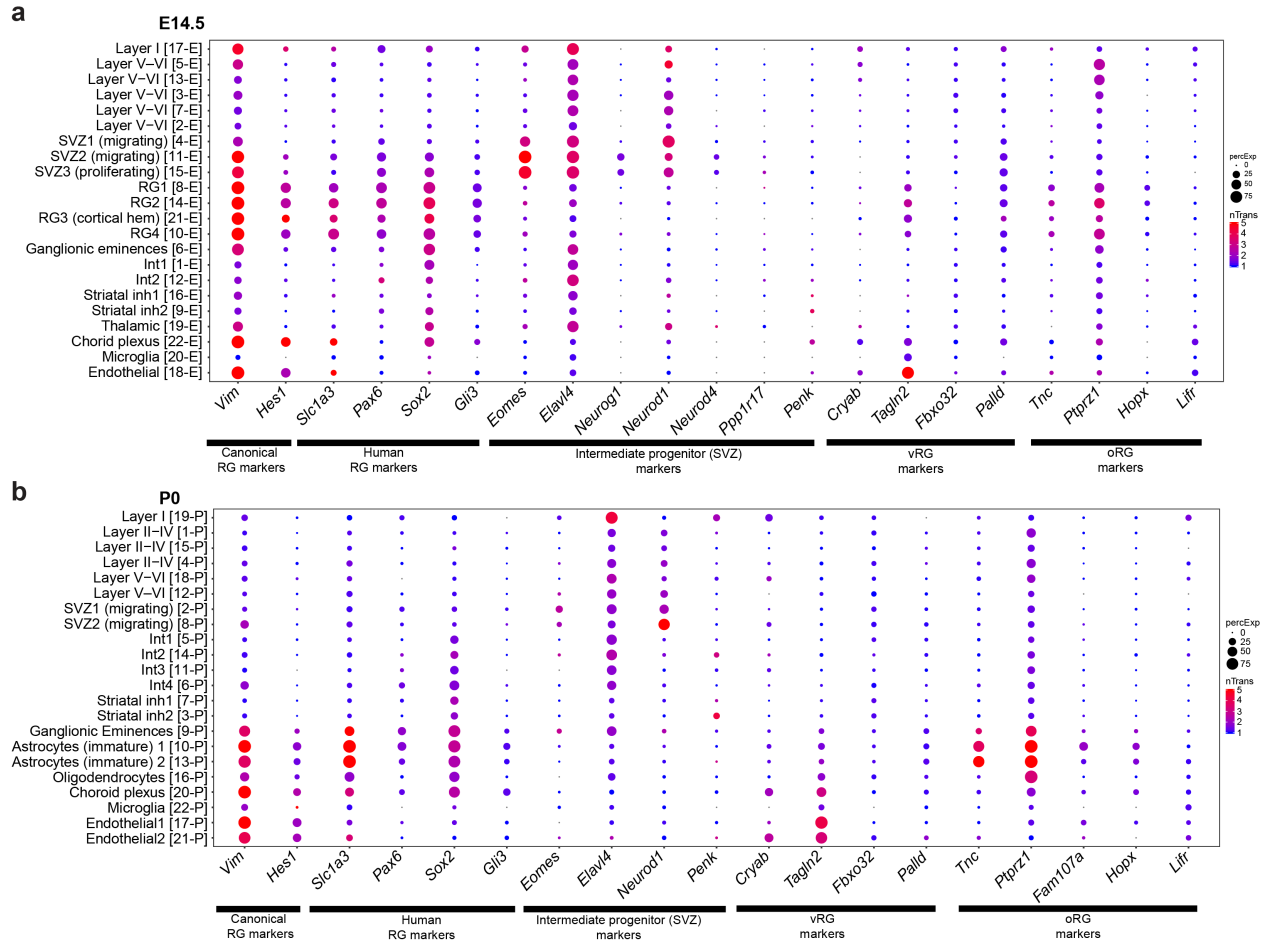

**Supplementary Figure 17. Expression of human radial glia markers.** Dotplot representations of expression levels and proportion of cells with detected transcripts for markers of human radial glia cell types in E14.5 (**a**) and P0 (**b**) cortex. Y axis denotes cluster type; X axis denotes gene name and radial glia cell type.

**Ganglionic eminences [6-E]**

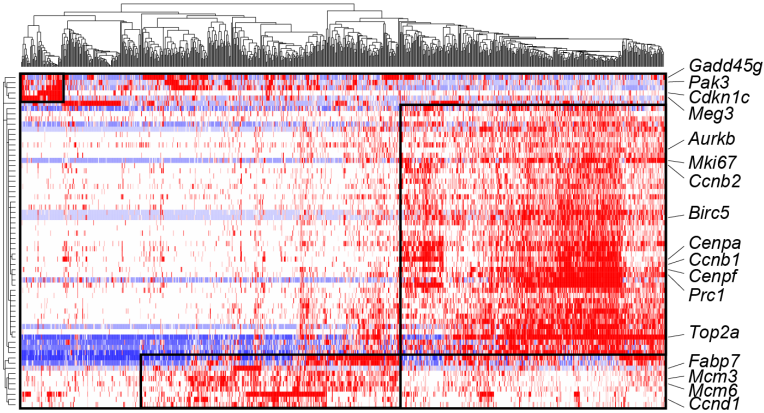

**Imprinting**  
**Negative regulation of cell cycle**

**Microtubule binding**  
**Nuclear division**  
**Mitotic cell cycle**

**G1/S phase of cell cycle**

**RG4 [10-E]**

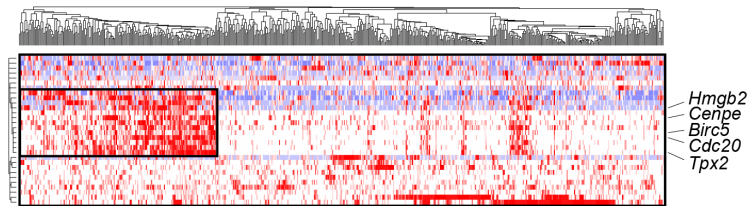

**Microtubule binding**  
**Mitotic anaphase**

**Microglia [20-E]**

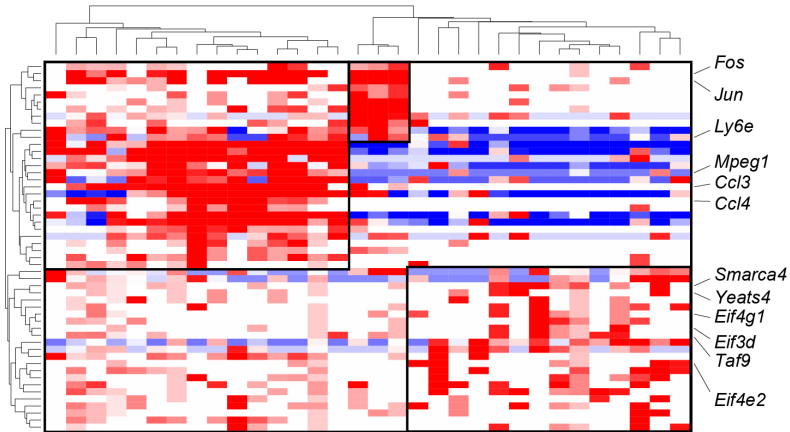

**Microglial activation**

**Translation**

**Choroid plexus [22-E]**

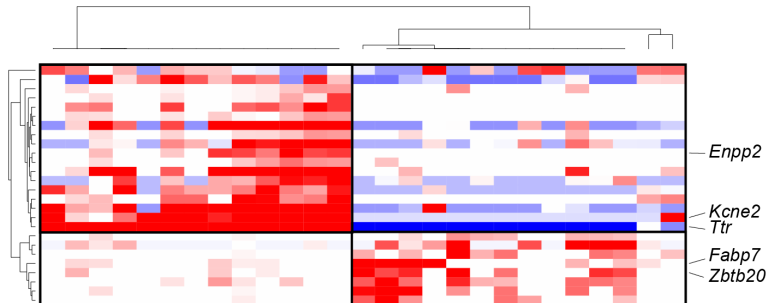

**Choroid**

**Ependymal precursors**

**Supplementary Figure 18. Heatmap representation of cellular sub-clusters within E14.5 cell types.** We identified cellular sub-clusters in 7 of the 22 E14.5 cell types, 3 of which are shown in Fig. 2. The expression of sub-cluster-specific genes was median-centered and hierarchically clustered for all cells within the greater cluster and expression values were then plotted as a heatmap. Some key genes of interest and functional ontologies/pathways into which these genes fall are shown. Marker genes that describe the entire cluster or other genes expression in >75% or <25% of cells are not shown.

**Ganglionic eminences [9-P]**

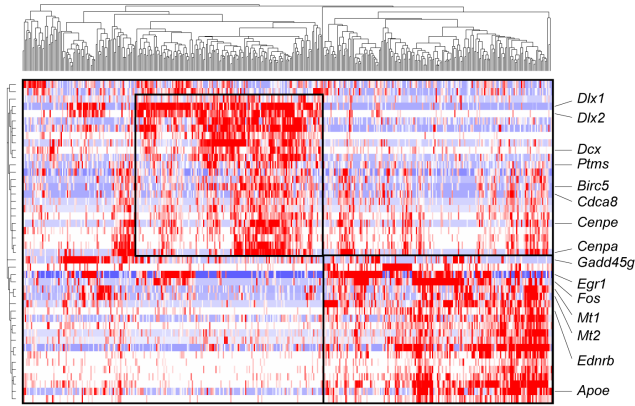

Microtubule binding  
Mitotic cell cycle

Synaptic transmission  
IEGs

**Oligodendrocytes [16-P]**

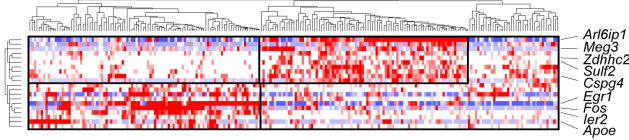

Unknown

IEGs

**Choroid plexus [20-P]**

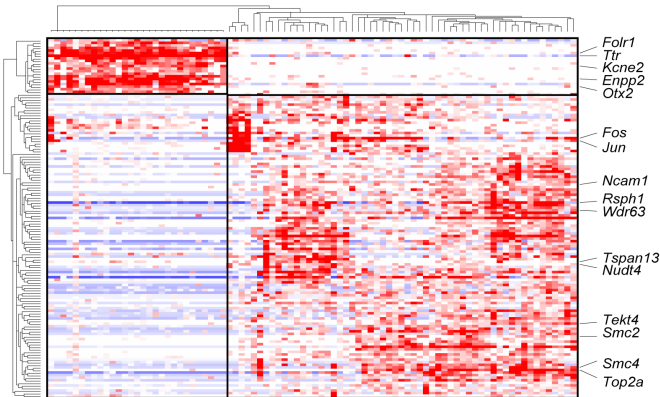

Choroid

Ependymal

**Endothelial2 [21-P]**

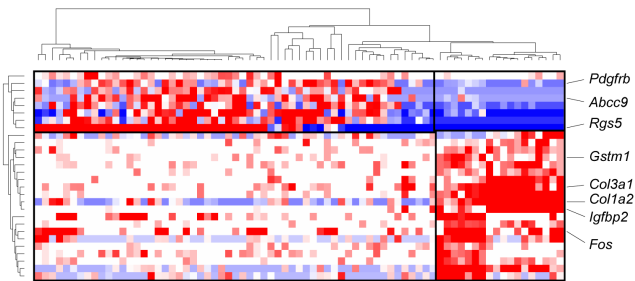

Pericytes

Meningeal

**Microglia [22-P]**

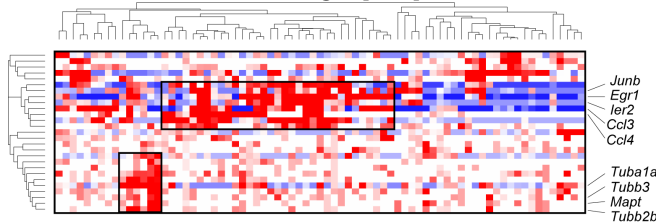

Activated state

Tubulin

**Supplementary Figure 19. Heatmap representation of cellular sub-clusters within P0 cell types.** We identified cellular sub-clusters in 5 of the 22 P0 cell types. The expression of sub-cluster-specific genes was median-centered and hierarchically clustered for all cells within the greater cluster and expression values were then plotted as a heatmap. Some key genes of interest and functional ontologies/pathways into which these genes fall are shown. Marker genes that describe the entire cluster or other genes expression in >75% or <25% of cells are not shown.

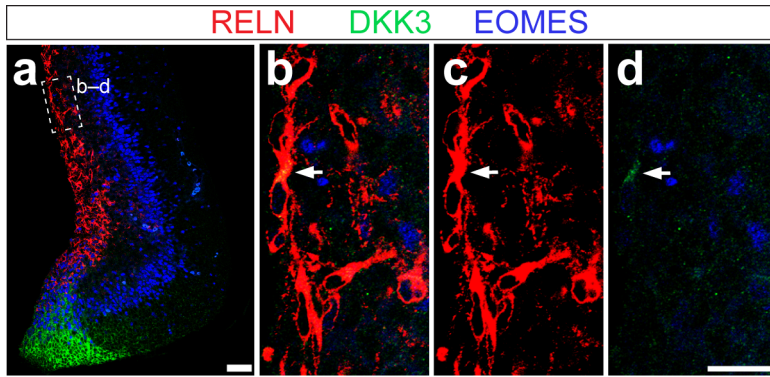

**Supplementary Figure 20. Empirical validation of Layer I sub-clusters in the E14.5 cortex.** Co-staining with DKK3 (green), EOMES (TBR2, blue), and RELN (Reelin, red). Cells expressing both DKK3 and RELN are labeled with white arrows. Scale bar represents 20  $\mu\text{m}$ .

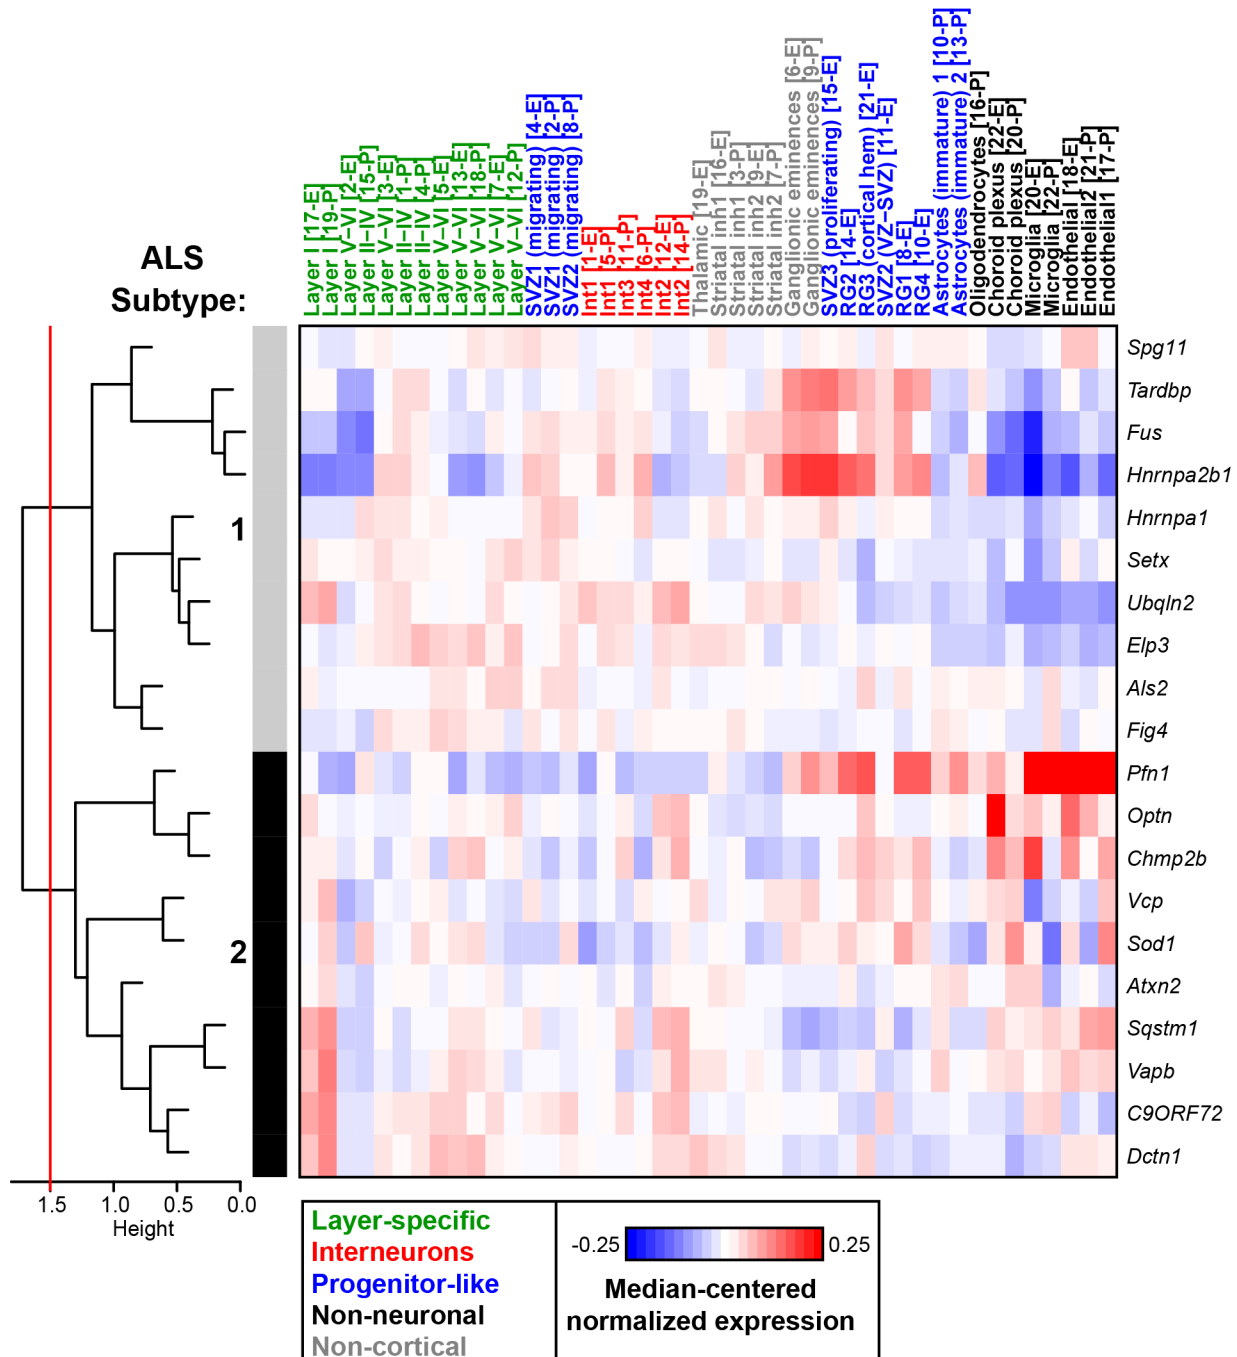

**Supplementary Figure 21. Genes linked to amyotrophic lateral sclerosis (ALS) form two subtypes based on cortical expression patterns.** Heatmap of ALS-linked genes clustered hierarchically by their expression across all 22 cell types for both E14.5 and P0. Pearson correlation distances were used to draw the dendrogram, and a height threshold of 1.5 (red line) was used to identify potential subtypes.

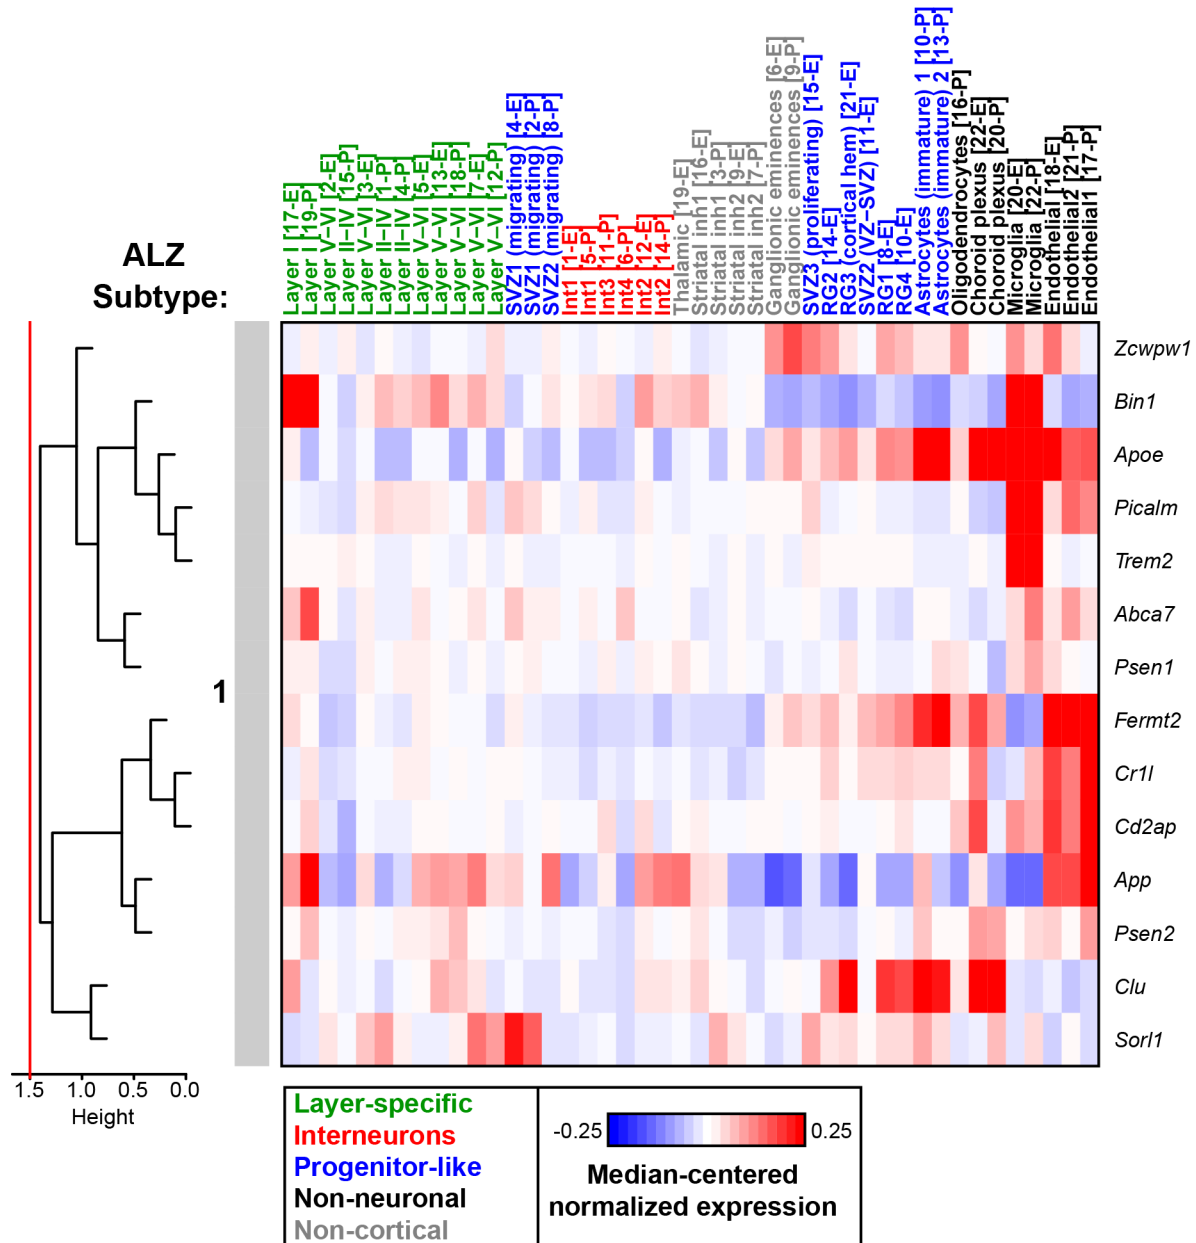

**Supplementary Figure 22. Genes linked to Alzheimer’s disease (ALZ) form one subtype based on cortical expression patterns.** Heatmap of Alzheimer’s-linked genes clustered hierarchically by their expression across all 22 cell types for both E14.5 and P0. Pearson correlation distances were used to draw the dendrogram, and a height threshold of 1.5 (red line) was used to identify potential subtypes.



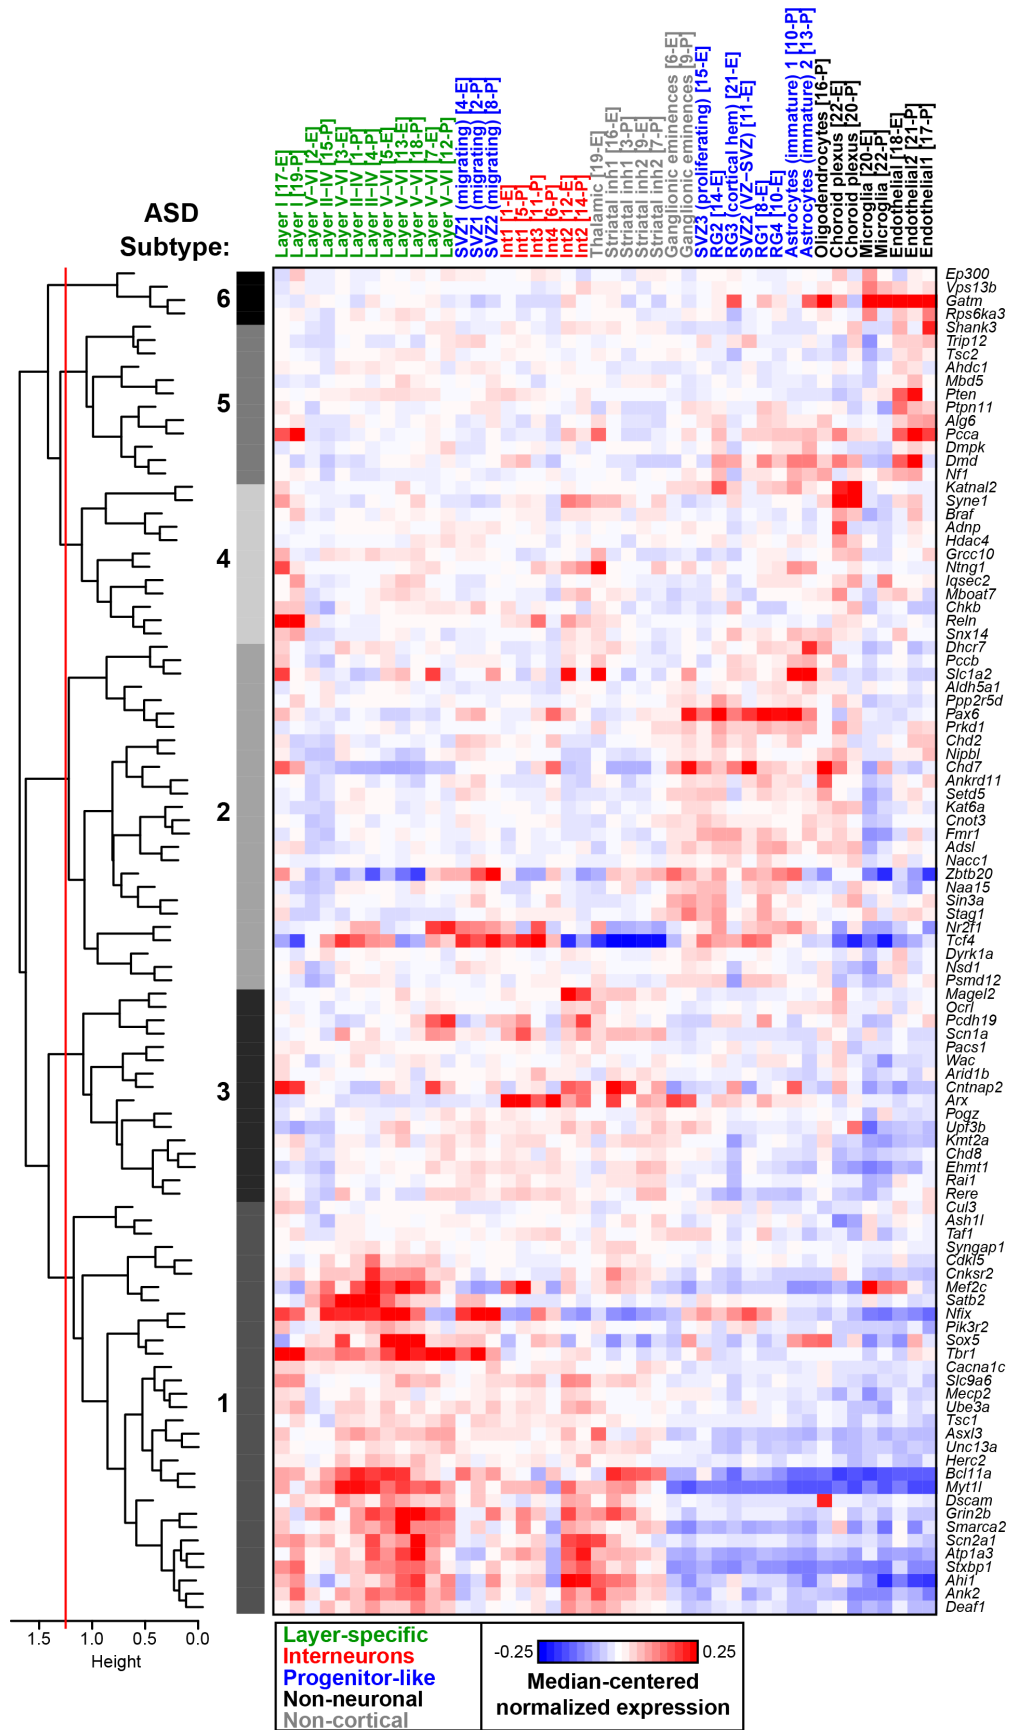

**Supplementary Figure 23. Genes linked to autism spectrum disorder (ASD) form six subtypes based on cortical expression patterns.** Heatmap of ASD-linked genes clustered hierarchically by their expression across all 22 cell types for both E14.5 and P0. Pearson correlation distances were used to draw the dendrogram, and a height threshold of 1.25 (red line) was used to identify potential subtypes.

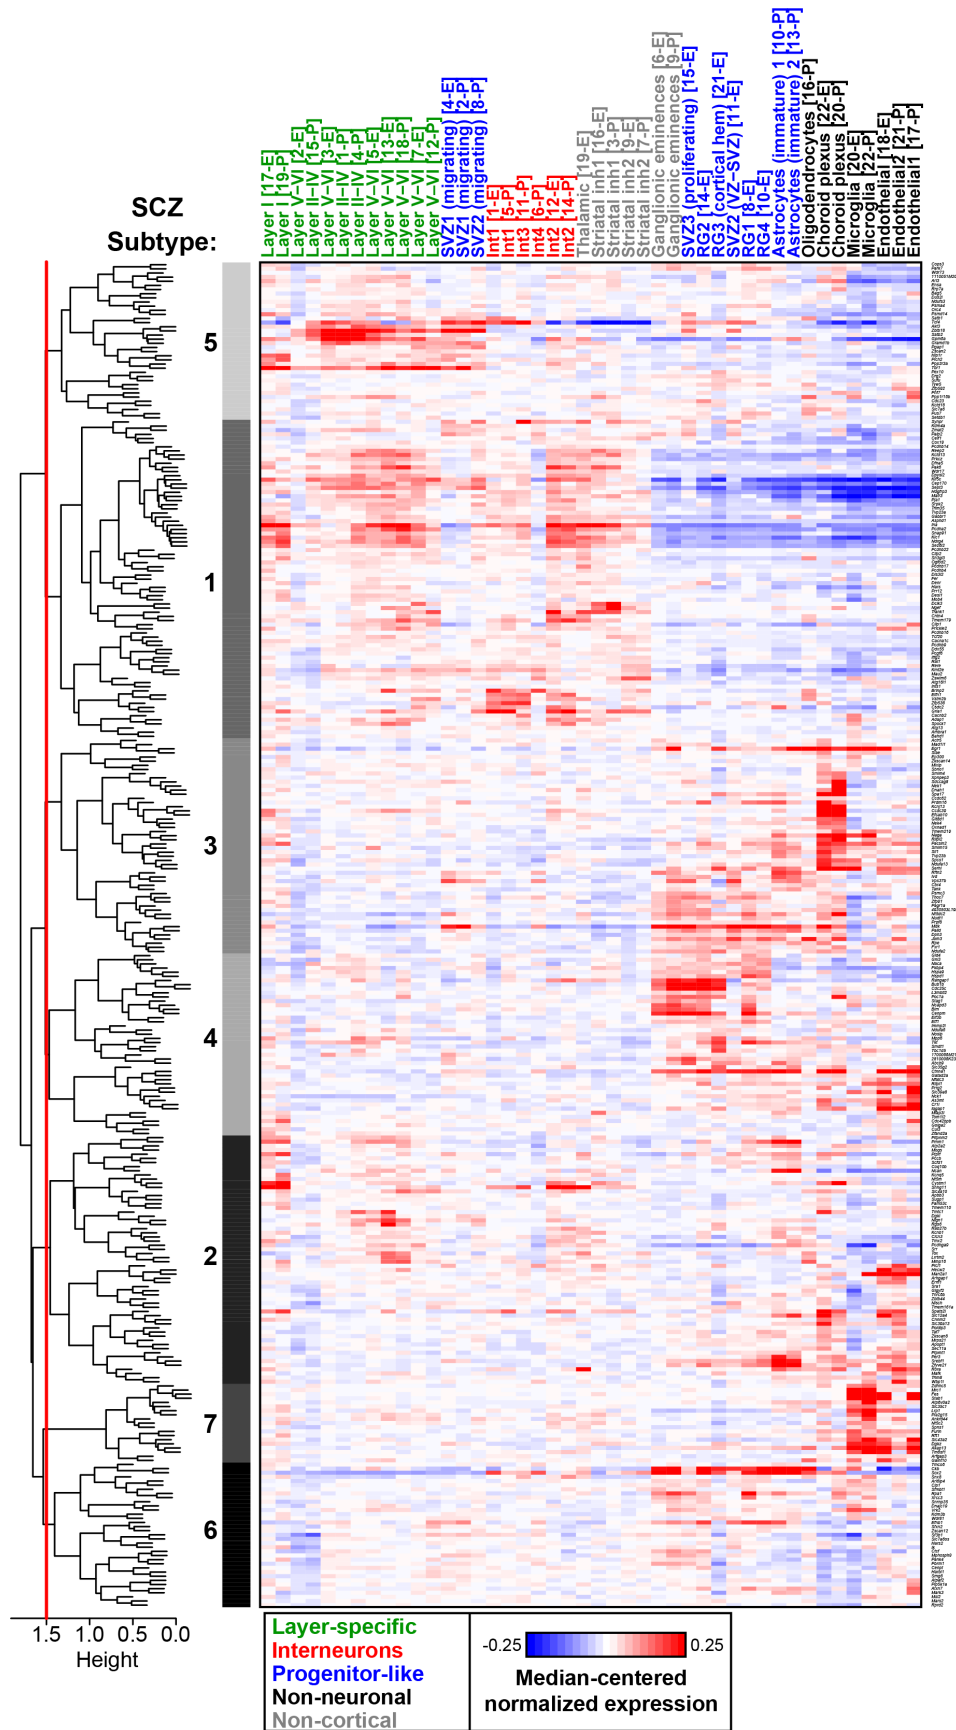

**Supplementary Figure 24. Genes linked to schizophrenia (SCZ) form seven subtypes based on cortical expression patterns.** Heatmap of SCZ-linked genes clustered hierarchically by their expression across all 22 cell types for both E14.5 and P0. Pearson correlation distances were used to draw the dendrogram, and a height threshold of 1.5 (red line) was used to identify potential subtypes.

| <b>Sample</b> | <b>Age</b> | <b>Raw Number Mouse Cells</b> | <b>Raw Number Human Cells</b> | <b>Raw Number Mixed Cells</b> | <b>Final Number Mouse Cells</b> | <b>Number Mouse Reads</b> |
|---------------|------------|-------------------------------|-------------------------------|-------------------------------|---------------------------------|---------------------------|
| E14.WT1       | E14.5      | 2409                          | 26                            | 58                            | 2376                            | 98351631                  |
| E14.WT2       | E14.5      | 2959                          | 27                            | 13                            | 2938                            | 131371970                 |
| E14.WT3       | E14.5      | 1426                          | 23                            | 46                            | 1389                            | 50853367                  |
| E14.WT4       | E14.5      | 897                           | 13                            | 86                            | 866                             | 55918810                  |
| E14.WT5       | E14.5      | 1441                          | 27                            | 32                            | 1434                            | 52825003                  |
| E14.WT6       | E14.5      | 1937                          | 32                            | 31                            | 1928                            | 89056846                  |
| P0.WT1        | P0         | 2443                          | 35                            | 21                            | 2419                            | 144389203                 |
| P0.WT2        | P0         | 2896                          | 66                            | 38                            | 2888                            | 128999337                 |
| P0.WT3        | P0         | 2349                          | 53                            | 97                            | 2307                            | 116787018                 |

**Supplementary Table 1. Sample metadata.** Total numbers of reads and cells for each biological replicate
